# Supplementary material
Source: PubMed Central journal article supplement (PMC10548479)
Supplement: NIHMS1882071-supplement-supinfo.pdf [file NIHMS1882071-supplement-supinfo.pdf]

## Supplemental Material for

# Biomarkers of gut barrier dysfunction and risk of hepatocellular carcinoma in the REVEAL-HBV and REVEAL-HCV Cohort Studies

Jessica L. Petrick, Andrea A. Florio, Jane Zen, Yanyu Wang, Andrew T. Gewirtz, Ruth M. Pfeiffer, Sarah Loftus, Jon Inglefield, Jill Koshiol, Baiyu Yang, Kelly Yu, Allan Hildesheim, Chien-Jen Chen, Hwai-I Yang, Mei-Hsuan Lee, Katherine A. McGlynn

Table of Contents:

Supplemental Tables S1 and S2

**Supplemental Table S1.** Spearman correlation coefficients for markers of gut bacterial translocation among controls in the REVEAL-HBV and REVEAL-HCV studies.

|                     | anti-Flagellin |        |        | anti-LPS |        |        | sCD14  | LBP    | ALT    |
|---------------------|----------------|--------|--------|----------|--------|--------|--------|--------|--------|
|                     | IgA            | IgG    | IgM    | IgA      | IgG    | IgM    |        |        |        |
| anti-flagellin IgA  | 1.000          | 0.813* | 0.485* | 0.803*   | 0.694* | 0.116  | -0.062 | 0.171* | -0.018 |
| anti-flagellin IgG  |                | 1.000  | 0.587* | 0.615*   | 0.776* | 0.100  | 0.016  | 0.227* | 0.043  |
| anti-flagellin IgM  |                |        | 1.000  | 0.403*   | 0.422* | 0.569* | 0.038  | 0.068  | 0.094  |
| anti-LPS IgA        |                |        |        | 1.000    | 0.747* | 0.162* | 0.011  | 0.141* | 0.016  |
| anti-LPS IgG        |                |        |        |          | 1.000  | 0.102  | -0.021 | 0.136* | -0.002 |
| anti-LPS IgM        |                |        |        |          |        | 1.000  | 0.070  | -0.091 | 0.075  |
| Soluble CD14        |                |        |        |          |        |        | 1.000  | 0.456* | 0.165* |
| LPS Binding Protein |                |        |        |          |        |        |        | 1.000  | 0.159* |
| ALT                 |                |        |        |          |        |        |        |        | 1.000  |

\*P<0.05.

**Supplemental Table S2.** Multivariate adjusted odds ratios (ORs) and 95% confidence intervals (CIs) for the associations between markers of gut bacterial translocation and hepatocellular carcinoma (HCC) among participants of the REVEAL-HBV and REVEAL-HCV cohorts, excluding cases diagnosed within 5 years of baseline.

|                                       | REVEAL-HBV |       |                 |              | REVEAL-HCV |       |                 |              |
|---------------------------------------|------------|-------|-----------------|--------------|------------|-------|-----------------|--------------|
|                                       | Controls   | Cases | OR <sup>1</sup> | 95% CI       | Controls   | Cases | OR <sup>2</sup> | 95% CI       |
| <b>anti-Flagellin IgA</b>             |            |       |                 |              |            |       |                 |              |
| Quartile 1                            | 41         | 30    | 1.00            | (referent)   | 24         | 28    | 1.00            | (referent)   |
| Quartile 2                            | 41         | 37    | 1.43            | (0.63, 3.23) | 24         | 23    | 0.82            | (0.29, 2.34) |
| Quartile 3                            | 40         | 51    | 1.35            | (0.61, 3.00) | 24         | 16    | 0.66            | (0.23, 1.94) |
| Quartile 4                            | 39         | 57    | 1.85            | (0.84, 4.09) | 24         | 26    | 1.12            | (0.44, 2.82) |
| <i>P-value for trend</i> <sup>3</sup> |            |       |                 | 0.17         |            |       |                 | 0.96         |
| Continuous (log <sub>2</sub> )        | 161        | 175   | 1.70            | (1.01, 2.84) | 96         | 93    | 1.23            | (0.50, 2.99) |
| <b>anti-Flagellin IgG</b>             |            |       |                 |              |            |       |                 |              |
| Quartile 1                            | 42         | 30    | 1.00            | (referent)   | 24         | 25    | 1.00            | (referent)   |
| Quartile 2                            | 40         | 40    | 1.45            | (0.64, 3.30) | 24         | 17    | 0.56            | (0.17, 1.82) |
| Quartile 3                            | 39         | 46    | 1.84            | (0.82, 4.13) | 24         | 26    | 1.19            | (0.46, 3.10) |
| Quartile 4                            | 40         | 59    | 1.81            | (0.82, 4.00) | 24         | 25    | 0.98            | (0.36, 2.65) |
| <i>P-value for trend</i> <sup>3</sup> |            |       |                 | 0.18         |            |       |                 | 0.76         |
| Continuous (log <sub>2</sub> )        | 161        | 175   | 1.60            | (0.81, 3.15) | 96         | 93    | 1.09            | (0.32, 3.69) |
| <b>anti-Flagellin IgM</b>             |            |       |                 |              |            |       |                 |              |
| Quartile 1                            | 40         | 36    | 1.00            | (referent)   | 24         | 22    | 1.00            | (referent)   |
| Quartile 2                            | 40         | 49    | 1.11            | (0.52, 2.37) | 24         | 25    | 1.12            | (0.40, 3.13) |
| Quartile 3                            | 41         | 47    | 0.83            | (0.38, 1.81) | 24         | 18    | 0.58            | (0.19, 1.76) |
| Quartile 4                            | 40         | 43    | 0.81            | (0.37, 1.75) | 24         | 28    | 1.11            | (0.41, 2.99) |
| <i>P-value for trend</i> <sup>3</sup> |            |       |                 | 0.45         |            |       |                 | 0.90         |
| Continuous (log <sub>2</sub> )        | 161        | 175   | 0.97            | (0.58, 1.62) | 96         | 93    | 1.10            | (0.37, 3.32) |
| <b>anti-LPS IgA</b>                   |            |       |                 |              |            |       |                 |              |
| Quartile 1                            | 40         | 20    | 1.00            | (referent)   | 24         | 28    | 1.00            | (referent)   |
| Quartile 2                            | 40         | 54    | 2.65            | (1.13, 6.23) | 24         | 25    | 0.82            | (0.33, 2.01) |
| Quartile 3                            | 41         | 42    | 1.56            | (0.66, 3.72) | 24         | 17    | 0.44            | (0.16, 1.22) |
| Quartile 4                            | 40         | 59    | 2.17            | (0.93, 5.06) | 24         | 23    | 0.93            | (0.35, 2.52) |
| <i>P-value for trend</i> <sup>3</sup> |            |       |                 | 0.52         |            |       |                 | 0.70         |
| Continuous (log <sub>2</sub> )        | 161        | 175   | 1.22            | (0.80, 1.85) | 96         | 93    | 0.75            | (0.33, 1.72) |
| <b>anti-LPS IgG</b>                   |            |       |                 |              |            |       |                 |              |
| Quartile 1                            | 41         | 31    | 1.00            | (referent)   | 24         | 22    | 1.00            | (referent)   |
| Quartile 2                            | 41         | 35    | 0.80            | (0.35, 1.84) | 24         | 22    | 0.84            | (0.28, 2.48) |
| Quartile 3                            | 39         | 58    | 1.75            | (0.79, 3.84) | 24         | 23    | 1.21            | (0.39, 3.71) |
| Quartile 4                            | 40         | 51    | 1.05            | (0.47, 2.34) | 24         | 26    | 1.34            | (0.44, 4.06) |
| <i>P-value for trend</i> <sup>3</sup> |            |       |                 | 0.46         |            |       |                 | 0.46         |
| Continuous (log <sub>2</sub> )        | 161        | 175   | 1.29            | (0.65, 2.59) | 96         | 93    | 1.93            | (0.40, 9.36) |
| <b>anti-LPS IgM</b>                   |            |       |                 |              |            |       |                 |              |
| Quartile 1                            | 41         | 33    | 1.00            | (referent)   | 24         | 21    | 1.00            | (referent)   |
| Quartile 2                            | 39         | 46    | 1.30            | (0.59, 2.83) | 24         | 31    | 1.38            | (0.56, 3.38) |
| Quartile 3                            | 41         | 41    | 0.88            | (0.39, 1.96) | 24         | 16    | 0.68            | (0.25, 1.86) |
| Quartile 4                            | 40         | 55    | 1.44            | (0.67, 3.10) | 24         | 25    | 0.98            | (0.36, 2.61) |
| <i>P-value for trend</i> <sup>3</sup> |            |       |                 | 0.58         |            |       |                 | 0.64         |
| Continuous (log <sub>2</sub> )        | 161        | 175   | 1.22            | (0.67, 2.22) | 96         | 93    | 0.89            | (0.33, 2.40) |
| <b>sCD14</b>                          |            |       |                 |              |            |       |                 |              |
| Quartile 1                            | 40         | 33    | 1.00            | (referent)   | 24         | 36    | 1.00            | (referent)   |
| Quartile 2                            | 41         | 37    | 1.30            | (0.57, 2.94) | 24         | 24    | 0.40            | (0.14, 1.15) |
| Quartile 3                            | 40         | 44    | 1.14            | (0.51, 2.55) | 24         | 16    | 0.34            | (0.13, 0.94) |
| Quartile 4                            | 40         | 61    | 1.61            | (0.73, 3.53) | 24         | 17    | 0.38            | (0.13, 1.09) |
| <i>P-value for trend</i> <sup>3</sup> |            |       |                 | 0.28         |            |       |                 | 0.030        |
| Continuous (log <sub>2</sub> )        | 161        | 175   | 1.33            | (0.70, 2.52) | 96         | 93    | 0.31            | (0.13, 0.74) |
| <b>LPS Binding Protein</b>            |            |       |                 |              |            |       |                 |              |
| Quartile 1                            | 42         | 29    | 1.00            | (referent)   | 24         | 38    | 1.00            | (referent)   |
| Quartile 2                            | 39         | 27    | 1.15            | (0.49, 2.66) | 24         | 11    | 0.08            | (0.02, 0.36) |

|                                       |     |     |      |              |    |    |      |              |
|---------------------------------------|-----|-----|------|--------------|----|----|------|--------------|
| Quartile 3                            | 40  | 48  | 1.45 | (0.66, 3.15) | 24 | 31 | 0.79 | (0.31, 2.01) |
| Quartile 4                            | 40  | 71  | 2.21 | (1.02, 4.80) | 24 | 13 | 0.14 | (0.04, 0.48) |
| <i>P-value for trend</i> <sup>3</sup> |     |     |      | 0.030        |    |    |      | 0.078        |
| Continuous (log <sub>2</sub> )        | 161 | 175 | 1.95 | (1.11, 3.44) | 96 | 93 | 0.54 | (0.28, 1.05) |

<sup>1</sup>Unconditional logistic regression adjusted for age, sex, HBV DNA copies at baseline, smoking status, alcohol consumption, BMI, education status, baseline cirrhosis status, ALT, and HbeAG.

<sup>2</sup>Conditional logistic regression adjusted for matching factors (age, sex, and HCV-RNA-positive rate), smoking status, alcohol consumption, BMI, education status, baseline cirrhosis status, baseline diabetes status, ALT, and HCV genotype.

<sup>3</sup>P-value for trend calculated using the Wald test.
